# Supplementary material for: Three-dimensional Ni4O4-cubane metal–organic framework as a high-performance electrocatalyst for urea oxidation
Source: Royal Society of Chemistry journal article supplement (doi:10.1039/d2ra05145a), 2022-01-01
Supplement: d2ra05145a1.pdf [file d2ra05145a1.pdf]

## **Supporting information**

### **Three dimensional Ni<sub>4</sub>O<sub>4</sub>-cubane metal organic framework as a high-performance urea oxidation electrocatalyst**

Mariam Batool,<sup>1</sup> Amir Waseem,<sup>1</sup> and Muhammad Arif Nadeem <sup>\*1,2</sup>

<sup>1</sup>Catalysis and Nanomaterials Lab 27, Department of Chemistry, Quaid-i-Azam University, Islamabad 45320, Pakistan

<sup>2</sup> Pakistan Academy of Sciences, 3-Constitution Avenue Sector G-5/2, Islamabad, Pakistan.

\*Contact details:

M.A.N. [manadeem@qau.edu.pk](mailto:manadeem@qau.edu.pk), +92-51-9064-2062

## Calculation method

### Determination of Tafel slope

Tafel slope was calculated by overpotential ( $\eta$ ) and current density ( $j$ ) by using Tafel equation.<sup>1</sup>

$$\eta = b \log j + a$$

### TOF

Turnover frequency (TOF) values of different samples were calculated according to the equation:<sup>2</sup>

$$TOF = \frac{j \times A}{6 \times F \times n}$$

Where  $j$  is the current density at a given overpotential,  $A$  is the surface of the electrode,  $F$  is the Faraday constant, and  $n$  is the number of moles of metal on the electrode.

### Mass activity

$$\text{Mass activity} = j/m^3$$

Mass activity (A/g) value was calculated from the electrocatalyst loading  $m$  (0.32 mg/cm<sup>2</sup>) and the measured current density  $j$  (10 mA/cm<sup>2</sup> at 1.24 V vs. RHE)

### Determination of electrochemical double-layer capacitance ( $C_{dl}$ )

For electrochemical double-layer capacitance ( $C_{dl}$ ) determination, the scan rate dependent CV measurements were carried out between 2 mV/s to 14 mV/s over a small window where no Faradaic current was observed (1.065 – 1.165 V). The electrochemical double layer capacitance ( $C_{dl}$ ) was extracted from  $i_c = v \times C_{dl}$ , where  $v$  is the scan rate and  $i_c$  is the current density for the specific curve at 1.11 V.<sup>1</sup>

### ECSA

The electrochemical active surface area (ECSA) is calculated as<sup>2</sup>

$$ECSA = C_{dl}/C_s$$

Where  $C_{dl}$  is double layer capacitance and  $C_s$  is the specific capacitance ( $C_s = 60 \mu\text{F cm}^{-2}$ )

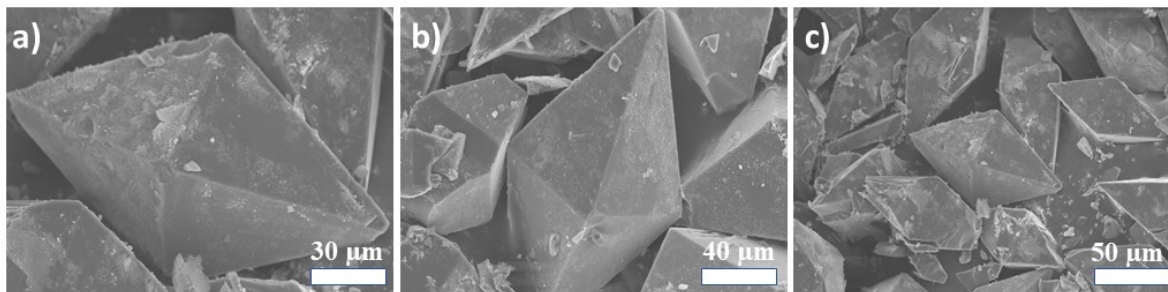

**Fig. S1** SEM image of **MOF 1** at different resolutions a) 30  $\mu\text{m}$  b) 40  $\mu\text{m}$  c) 50  $\mu\text{m}$

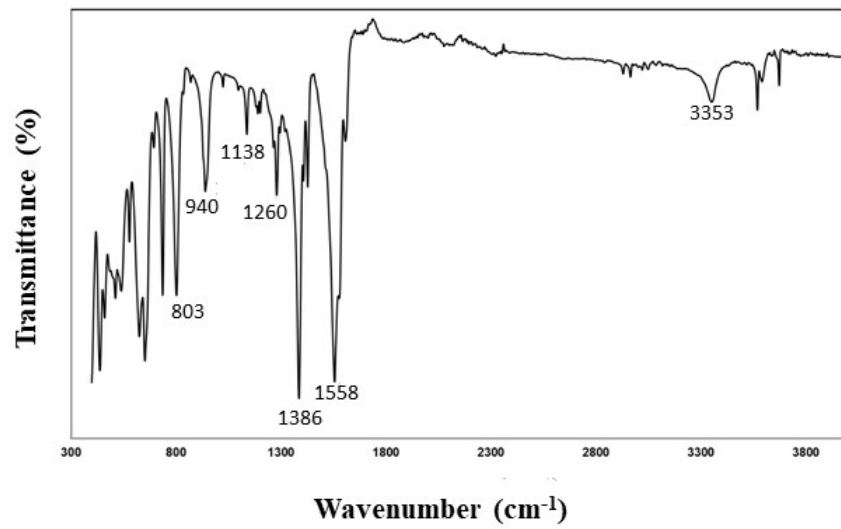

**Fig. S2** FT-IR spectrum of MOF 14

## Thermogravimetric Analysis

Thermogravimetric analyses were performed under nitrogen flux using a Mettler Toledo TGA/SDTA 851 at a heating rate of  $10\text{ }^{\circ}\text{C min}^{-1}$  to assess the thermal stability of **MOF 1** (Fig. S2). **MOF 1** is thermally stable up to  $380^{\circ}\text{C}$ . An initial weight loss (ca. 5%) starting at  $150^{\circ}\text{C}$  is due to loss of one water molecule coordinated to  $\text{Ni}^{3+}$  (calc. 5.06%) in the framework. At higher temperatures the mass remains constant, followed by sudden decrease in the weight, suggesting the onset of decomposition around  $380^{\circ}\text{C}$  with a total weight loss of 55.3% (calc. 57.98%), resulting in simple oxides ( $\text{NiO}$ ).

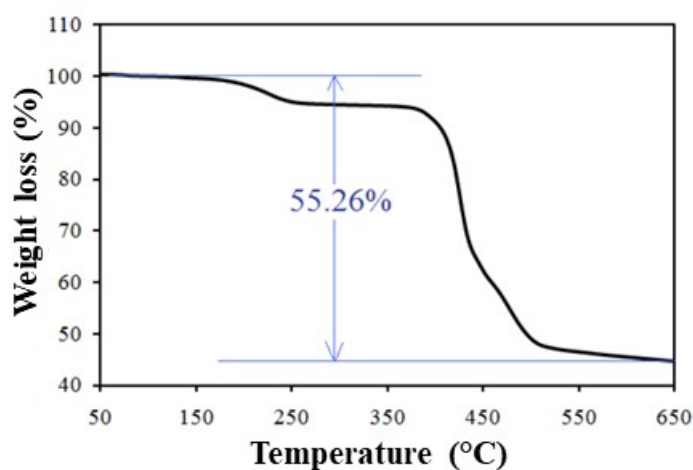

**Fig. S3** Thermogravimetric analysis of **MOF 1**<sup>4</sup>

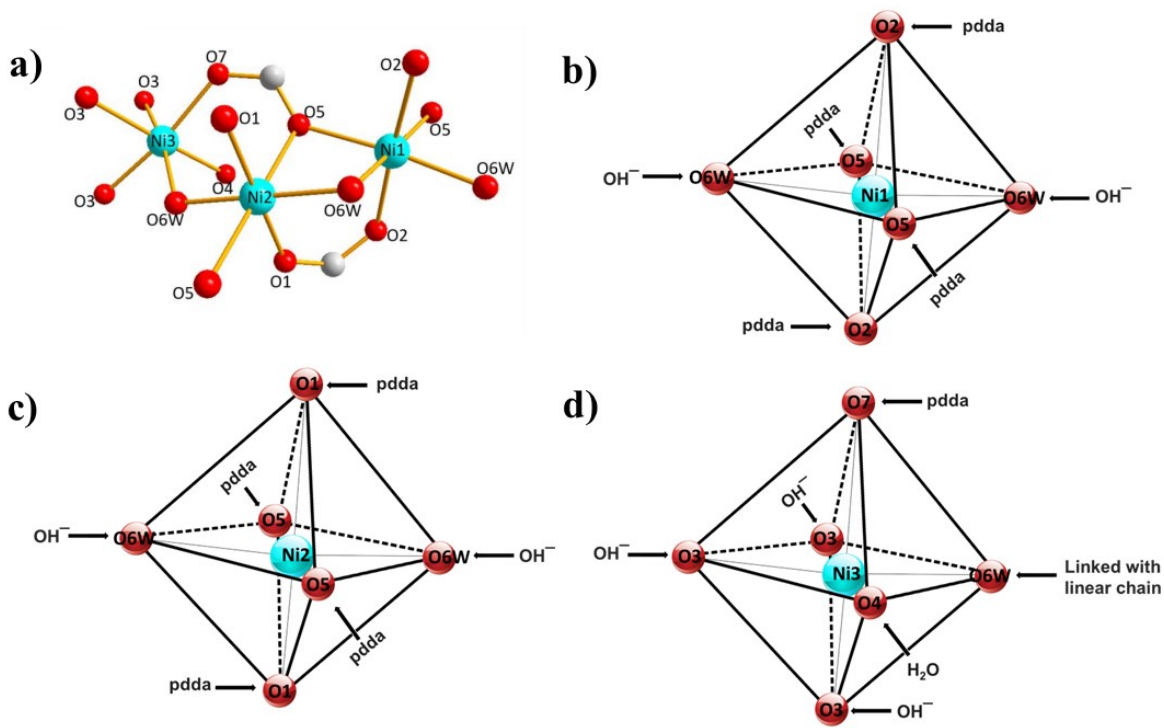

**Fig. S4** a) Coordination environment of all three Ni b) Ni1 c) Ni2 d) Ni3

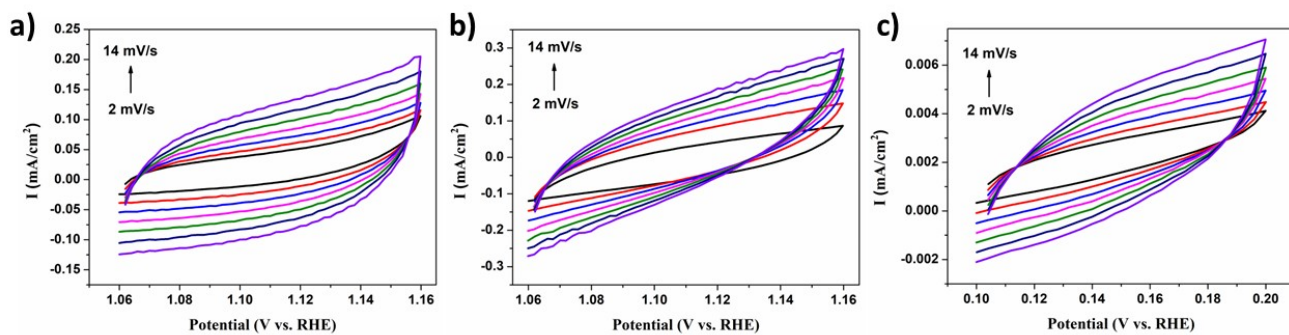

**Fig. S5** Cyclic voltammograms in non-faradaic region with incremental 2 mV/s sweep rate a) Pt/C b) Ni(OH)<sub>2</sub> c) Bare FTO



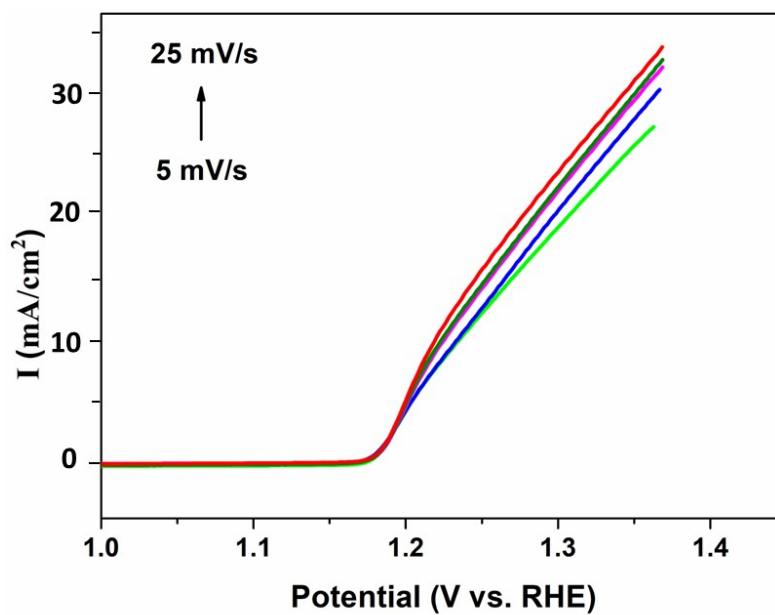

**Fig. S6** LSV of MOF 1 at varied scan rates (5  $\text{mV}/\text{s}$  to 25  $\text{mV}/\text{s}$ )

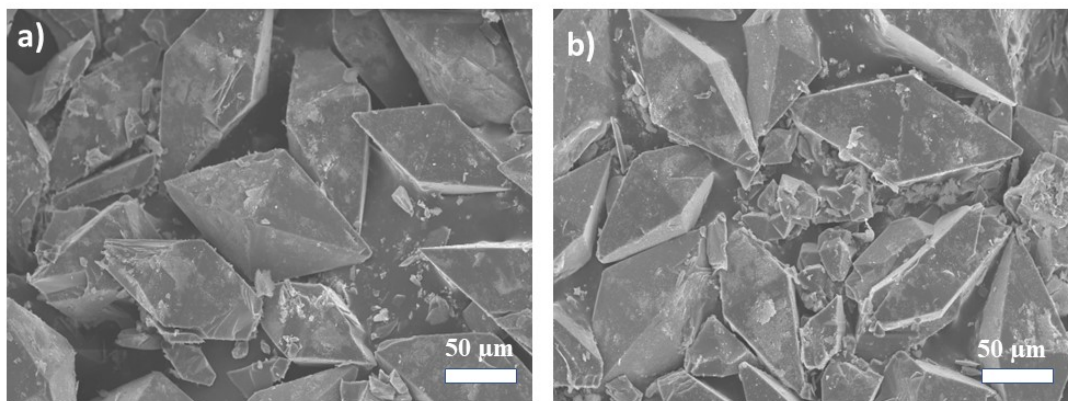

**Fig. S7** SEM image of **MOF 1** a) before stability test b) after 17 h continuous test

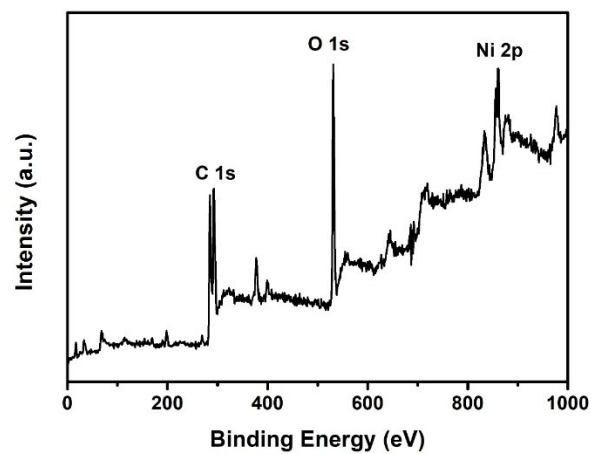

**Fig. S8** XPS survey spectrum of **MOF 1**

## References

1. M. Batool, S. Ibrahim, B. Iqbal, S. Ali, A. Badshah, S. Abbas, D. R. Turner and M. A. Nadeem, *Electrochim. Acta*, 2019, **298**, 248.
2. Z. Gao, Y. Wang, L. Xu, Q. Tao, X. Wang, Z. Zhou, Y. Luo, J. Yu and Y. Huang, *Chem. Eng. J.* 2022, **433**, 133515.
3. J. Huang, J. Chen, T. Yao, J. He, S. Jiang, Z. Sun, Q. Liu, W. Cheng, F. Hu and Y. Jiang, *Angew. Chem. Int. Ed.* 2015, **127**, 8846.
4. M. A. Nadeem, M.C. C. Ng, J. van Leusen, P. Kögerler, J. A. Stride, *Chem. Eur. J.* 2020, **26**, 7589.
